# Supplementary material for: Minocycline/Amoxicillin-Based Bismuth Quadruple Therapy for Helicobacter pylori Eradication: A Pilot Study
Source: MDPI journal article supplement (doi:10.3390/microorganisms12030429), 2024-02-20
Supplement: s1 [file s1]

**Table S1.** Minimum inhibitory concentrations (MICs) of tetracycline and minocycline to 101 clinical *H. pylori* strains.

| No. | Tetracycline (mg/L) | Minocycline (mg/L) | No. | Tetracycline (mg/L) | Minocycline (mg/L) |
|-----|---------------------|--------------------|-----|---------------------|--------------------|
| 1   | 0.047               | 0.047              | 52  | 0.023               | 0.023              |
| 2   | 0.032               | 0.016              | 53  | 0.047               | 0.032              |
| 3   | 0.064               | 0.016              | 54  | 0.047               | 0.023              |
| 4   | 0.016               | 0.016              | 55  | 6                   | 0.023              |
| 5   | 0.094               | 0.047              | 56  | 0.38                | 0.023              |
| 6   | 0.19                | 0.023              | 57  | 0.094               | 0.047              |
| 7   | 0.25                | 0.032              | 58  | 0.047               | 0.032              |
| 8   | 0.094               | 0.047              | 59  | 0.023               | 0.016              |
| 9   | 0.064               | 0.016              | 60  | 0.047               | 0.023              |
| 10  | 0.19                | 0.064              | 61  | 0.064               | 0.016              |
| 11  | 0.125               | 0.047              | 62  | 0.064               | 0.032              |
| 12  | 0.047               | 0.032              | 63  | 0.047               | 0.016              |
| 13  | 0.047               | 0.016              | 64  | 0.025               | 0.047              |
| 14  | 0.032               | 0.023              | 65  | 0.064               | 0.032              |
| 15  | 0.125               | 0.032              | 66  | 0.064               | 0.047              |
| 16  | 0.032               | 0.032              | 67  | 0.19                | 0.032              |
| 17  | 0.094               | 0.016              | 68  | 1.5                 | 0.38               |
| 18  | 0.064               | 0.023              | 69  | 0.064               | 0.016              |
| 19  | 0.38                | 0.064              | 70  | 0.19                | 0.047              |
| 20  | 0.047               | 0.023              | 71  | 0.023               | 0.047              |
| 21  | 0.19                | 0.023              | 72  | 0.047               | 0.032              |
| 22  | 0.064               | 0.032              | 73  | 0.064               | 0.023              |
| 23  | 0.094               | 0.047              | 74  | 0.094               | 0.064              |
| 24  | 0.094               | 0.032              | 75  | 0.047               | 0.016              |
| 25  | 0.38                | 0.064              | 76  | 0.25                | 0.047              |
| 26  | 0.032               | 0.023              | 77  | 0.19                | 0.047              |
| 27  | 0.19                | 0.047              | 78  | 0.5                 | 0.125              |
| 28  | 0.016               | 0.023              | 79  | 0.125               | 0.094              |
| 29  | 0.125               | 0.064              | 80  | 0.094               | 0.032              |
| 30  | 0.032               | 0.016              | 81  | 0.38                | 0.047              |
| 31  | 0.023               | 0.032              | 82  | 2                   | 0.19               |
| 32  | 0.125               | 0.032              | 83  | 0.25                | 0.064              |
| 33  | 0.032               | 0.016              | 84  | 0.023               | 0.023              |
| 34  | 0.032               | 0.016              | 85  | 0.047               | 0.032              |

---

|    |       |       |     |       |       |
|----|-------|-------|-----|-------|-------|
| 35 | 0.032 | 0.016 | 86  | 0.064 | 0.032 |
| 36 | 0.125 | 0.032 | 87  | 0.064 | 0.023 |
| 37 | 0.023 | 0.032 | 88  | 0.19  | 0.023 |
| 38 | 0.064 | 0.016 | 89  | 0.047 | 0.047 |
| 39 | 0.064 | 0.016 | 90  | 0.047 | 0.016 |
| 40 | 0.19  | 0.047 | 91  | 0.064 | 0.016 |
| 41 | 0.064 | 0.047 | 92  | 0.032 | 0.016 |
| 42 | 0.094 | 0.032 | 93  | 0.094 | 0.023 |
| 43 | 0.032 | 0.047 | 94  | 0.023 | 0.016 |
| 44 | 0.125 | 0.047 | 95  | 0.064 | 0.023 |
| 45 | 0.023 | 0.047 | 96  | 0.047 | 0.032 |
| 46 | 0.19  | 0.016 | 97  | 0.064 | 0.016 |
| 47 | 0.094 | 0.047 | 98  | 0.064 | 0.032 |
| 48 | 0.032 | 0.023 | 99  | 0.094 | 0.016 |
| 49 | 0.064 | 0.016 | 100 | 0.094 | 0.032 |
| 50 | 0.023 | 0.016 | 101 | 0.125 | 0.023 |
| 51 | 0.032 | 0.032 |     |       |       |

---
